# Supplementary material for: Theoretical study coupling DFT calculations and kMC simulation of CO methanation on Ni(111) and Ni3Fe(111)
Source: Royal Society of Chemistry journal article supplement (doi:10.1039/d3nj03516f), 2023-01-01
Supplement: d3nj03516f1.pdf [file d3nj03516f1.pdf]

Table S1 Elementary processes included in the kMC simulation as well as corresponding kinetic parameters

for Ni(111) surface

| No. | Elementary process                                                        | $E_{a,f}$ (eV) | $E_{a,r}$ (eV) | $\nu_{0,f}$ (s <sup>-1</sup> ) | $\nu_{0,r}$ (s <sup>-1</sup> ) |
|-----|---------------------------------------------------------------------------|----------------|----------------|--------------------------------|--------------------------------|
| 1   | $\text{CO(g)}+* \leftrightarrow \text{CO}^*$                              | 0              | 1.60           | <b>a</b>                       | <b>b</b>                       |
| 2   | $\text{H}_2(\text{g})+2* \leftrightarrow \text{H}^*+\text{H}^*$           | 0              | 0.82           | <b>c</b>                       | <b>b</b>                       |
| 3   | $\text{CO}^*+* \leftrightarrow \text{C}^*+\text{O}^*$                     | 3.18           | 1.37           | 5.59E+12                       | 4.31E+13                       |
| 4   | $\text{CO}^*+\text{H}^* \leftrightarrow \text{COH}^*+*$                   | 2.17           | 1.19           | 3.73E+13                       | 4.55E+13                       |
| 5   | $\text{COH}^*+* \leftrightarrow \text{C}^*+\text{OH}^*$                   | 2.10           | 1.30           | 8.35E+12                       | 2.08E+13                       |
| 6   | $\text{CO}^*+\text{H}^* \leftrightarrow \text{HCO}^*+*$                   | 1.68           | 0.40           | 3.23E+13                       | 4.87E+13                       |
| 7   | $\text{HCO}^*+* \leftrightarrow \text{CH}^*+\text{O}^*$                   | 1.10           | 1.28           | 7.44E+12                       | 3.72E+13                       |
| 8   | $\text{C}^*+\text{H}^* \leftrightarrow \text{CH}^*+*$                     | 0.98           | 1.55           | 6.03E+13                       | 4.93E+13                       |
| 9   | $\text{CH}^*+\text{H}^* \leftrightarrow \text{CH}_2^*+*$                  | 0.75           | 0.42           | 4.89E+13                       | 1.25E+13                       |
| 10  | $\text{CH}_2^*+\text{H}^* \leftrightarrow \text{CH}_3^*+*$                | 0.78           | 0.89           | 6.66E+12                       | 1.55E+13                       |
| 11  | $\text{CH}_3^*+\text{H}^* \leftrightarrow \text{CH}_4(\text{g})+2*$       | 1.18           | 1.62           | 7.22E+13                       | <b>d</b>                       |
| 12  | $\text{O}^*+\text{H}^* \leftrightarrow \text{OH}^*+*$                     | 1.44           | 1.35           | 5.54E+13                       | 2.37E+13                       |
| 13  | $\text{OH}^*+\text{H}^* \leftrightarrow \text{H}_2\text{O}^*+*$           | 1.53           | 1.35           | 2.15E+14                       | 1.87E+13                       |
| 14  | $\text{OH}^*+\text{OH}^* \leftrightarrow \text{H}_2\text{O}^*+\text{O}^*$ | 0.43           | 0.68           | 3.99E+12                       | 4.69E+12                       |
| 15  | $\text{H}_2\text{O}^* \rightarrow \text{H}_2\text{O}(\text{g})+*$         | 0.05           |                | <b>b</b>                       |                                |
| 16  | $\text{CO}^*+\text{O}^* \rightarrow 2*+\text{CO}_2(\text{g})$             | 1.65           | 0.51           | 8.26E+13                       |                                |
| 17  | $\text{CO}^*+* \rightarrow *+\text{CO}^*$                                 | 0.16           |                | 3.57E+12                       |                                |
| 18  | $\text{H}^*+* \rightarrow *+\text{H}^*$                                   | 0.14           |                | 1.45E+13                       |                                |
| 19  | $\text{O}^*+* \rightarrow *+\text{O}^*$                                   | 0.51           |                | 9.48E+12                       |                                |
| 20  | $\text{OH}^*+* \rightarrow *+\text{OH}^*$                                 | 0.29           |                | 4.28E+13                       |                                |

**a** is calculated according to Eq. 10. **b** is calculated according to Eq. 14. **c** is calculated according to Eq. 11. **d** According to Eq. 20 and the same below.

Table S2 Elementary processes included in the kMC simulation as well as corresponding kinetic parameters

for Ni(211) surface

| No. | Elementary process                                                                         | $E_{a,f}$ (eV) | $E_{a,r}$ (eV) | $v_{0,f}$ (s <sup>-1</sup> ) | $v_{0,r}$ (s <sup>-1</sup> ) |
|-----|--------------------------------------------------------------------------------------------|----------------|----------------|------------------------------|------------------------------|
| 1   | $\text{CO(g)}+* \leftrightarrow \text{CO}^*$                                               | 0              | 1.64           | a                            | b                            |
| 2   | $\text{H}_2(\text{g})+2* \leftrightarrow \text{H}^*+\text{H}^*$                            | 0              | 0.82           | c                            | b                            |
| 3   | $\text{CO}^*+* \leftrightarrow \text{C}^*+\text{O}^*$                                      | 2.18           | 1.89           | 1.98E+13                     | 6.33E+13                     |
| 4   | $\text{CO}^*+\text{H}^* \leftrightarrow \text{COH}^*+*$                                    | 1.31           | 0.87           | 9.65E+12                     | 1.00E+14                     |
| 5   | $\text{COH}^*+* \leftrightarrow \text{C}^*+\text{OH}^*$                                    | 1.08           | 1.91           | 3.64E+13                     | 5.63E+13                     |
| 6   | $\text{CO}^*+\text{H}^* \leftrightarrow \text{HCO}^*+*$                                    | 0.91           | 0.18           | 1.72E+13                     | 5.09E+13                     |
| 7   | $\text{HCO}^*+* \leftrightarrow \text{CH}^*+\text{O}^*$                                    | 0.97           | 1.14           | 2.06E+13                     | 2.20E+13                     |
| 8   | $\text{C}^*+\text{H}^* \leftrightarrow \text{CH}^*+*$                                      | 0.94           | 0.82           | 2.21E+13                     | 2.85E+13                     |
| 9   | $\text{CH}^*+\text{H}^* \leftrightarrow \text{CH}_2-1^*+*$                                 | 0.73           | 0.28           | 1.02E+13                     | 2.11E+13                     |
| 10  | $\text{CH}_2-1^*+* \leftrightarrow *+\text{CH}_2^*$                                        | 0.32           | 0.60           | 1.37E+13                     | 6.46E+12                     |
| 11  | $\text{CH}_2^*+\text{H}^* \leftrightarrow \text{CH}_3^*+*$                                 | 0.42           | 0.76           | 7.30E+12                     | 1.37E+13                     |
| 12  | $\text{CH}_3^*+\text{H}^* \leftrightarrow \text{CH}_4(\text{g})+2*$                        | 0.92           | 1.07           | 8.24E+12                     | d                            |
| 13  | $\text{O}^*+\text{H}^* \leftrightarrow \text{OH}^*+*$                                      | 0.95           | 1.32           | 2.32E+14                     | 1.14E+14                     |
| 14  | $\text{OH}^*+\text{H}^* \leftrightarrow \text{H}_2\text{O}^*+*$                            | 1.51           | 1.02           | 4.91E+14                     | 7.09E+13                     |
| 15  | $\text{OH}^*+\text{OH}^* \leftrightarrow \text{H}_2\text{O}^*+\text{O}^*$                  | 0.81           | 0.63           | 4.66E+13                     | 1.61E+13                     |
| 16  | $\text{H}_2\text{O}^* \rightarrow \text{H}_2\text{O}(\text{g})+*$                          | 0.29           |                | b                            |                              |
| 17  | $\text{CO}^*+\text{O}^* \rightarrow 2^*+\text{CO}_2(\text{g})$                             | 1.79           | 1.07           | 3.16E+12                     |                              |
| 18  | $\text{CO}^*+\text{OH}^* \leftrightarrow \text{COOH-cis}^*+*$                              | 1.43           | 0.24           | 3.96E+13                     | 6.70E+13                     |
| 19  | $\text{COOH-cis}^* \leftrightarrow \text{COOH-trans}^*$                                    | 0.40           | 0.71           | 8.68E+12                     | 2.93E+13                     |
| 20  | $\text{COOH-trans}^* \rightarrow \text{CO}_2(\text{g})+\text{H}^*$                         | 1.00           | 0.96           | 7.61E+13                     |                              |
| 21  | $\text{COOH-trans}^*+\text{O}^* \rightarrow \text{CO}_2(\text{g})+\text{OH}^*+*$           | 0.25           | 0.10           | 1.99E+13                     |                              |
| 22  | $\text{COOH-trans}^*+\text{OH}^* \rightarrow \text{CO}_2(\text{g})+\text{H}_2\text{O}^*+*$ | 0.41           | 0.34           | 2.13E+12                     |                              |
| 23  | $\text{CO}^*+* \rightarrow *+\text{CO}^*$                                                  | 0.13           |                | 2.56E+12                     |                              |
| 24  | $\text{H}^*+* \rightarrow *+\text{H}^*$                                                    | 0.17           |                | 2.00E+13                     |                              |
| 25  | $\text{O}^*+* \rightarrow *+\text{O}^*$                                                    | 0.39           |                | 1.08E+13                     |                              |
| 26  | $\text{OH}^*+* \rightarrow *+\text{OH}^*$                                                  | 0.70           |                | 4.72E+13                     |                              |

Table S3 Elementary processes included in the kMC simulation as well as corresponding kinetic parameters  
for Ni<sub>3</sub>Fe(111) surface

| No. | Elementary process                                            | $E_{a,f}$ (eV) | $E_{a,r}$ (eV) | $\nu_{0,f}$ (s <sup>-1</sup> ) | $\nu_{0,r}$ (s <sup>-1</sup> ) |
|-----|---------------------------------------------------------------|----------------|----------------|--------------------------------|--------------------------------|
| 1   | CO(g)+* $\leftrightarrow$ CO*                                 | 0              | 1.59           | a                              | b                              |
| 2   | H <sub>2</sub> (g)+2* $\leftrightarrow$ H*+H*                 | 0              | 0.90           | c                              | b                              |
| 3   | CO*+* $\leftrightarrow$ C*+O*                                 | 2.82           | 1.20           | 4.17E+12                       | 3.36E+13                       |
| 4   | CO*+H* $\leftrightarrow$ COH*+*                               | 2.19           | 1.17           | 2.29E+13                       | 2.55E+13                       |
| 5   | COH*+* $\leftrightarrow$ C*+OH*                               | 1.87           | 1.20           | 1.82E+13                       | 2.00E+13                       |
| 6   | CO*+H* $\leftrightarrow$ HCO*+*                               | 1.45           | 0.36           | 7.61E+13                       | 1.33E+14                       |
| 7   | HCO*+* $\leftrightarrow$ CH*+O*                               | 1.01           | 1.11           | 6.55E+12                       | 2.54E+13                       |
| 8   | C*+H* $\leftrightarrow$ CH*+*                                 | 0.95           | 1.46           | 4.26E+13                       | 2.34E+13                       |
| 9   | CH*+H* $\leftrightarrow$ CH <sub>2</sub> *+*                  | 0.67           | 0.50           | 1.54E+13                       | 8.80E+12                       |
| 10  | CH <sub>2</sub> *+H* $\leftrightarrow$ CH <sub>3</sub> *+*    | 0.74           | 0.91           | 5.77E+13                       | 2.16E+14                       |
| 11  | CH <sub>3</sub> *+H* $\leftrightarrow$ CH <sub>4</sub> (g)+2* | 1.12           | 1.44           | 3.04E+14                       | d                              |
| 12  | O*+H* $\leftrightarrow$ OH*+*                                 | 1.29           | 1.29           | 8.43E+13                       | 3.59E+13                       |
| 13  | OH*+H* $\leftrightarrow$ H <sub>2</sub> O*+*                  | 1.49           | 1.13           | 2.23E+14                       | 1.77E+13                       |
| 14  | OH*+OH* $\leftrightarrow$ H <sub>2</sub> O*+O*                | 0.65           | 0.58           | 3.76E+12                       | 8.10E+12                       |
| 15  | H <sub>2</sub> O* $\rightarrow$ H <sub>2</sub> O(g)+*         | 0.17           |                | b                              |                                |
| 16  | CO*+O* $\rightarrow$ 2*+CO <sub>2</sub> (g)                   | 1.61           | 0.41           | 2.00E+13                       |                                |
| 17  | CO*+* $\rightarrow$ *+CO*                                     | 0.20           |                | 6.05E+12                       |                                |
| 18  | H*+* $\rightarrow$ *+H*                                       | 0.11           |                | 1.23E+13                       |                                |
| 19  | O*+* $\rightarrow$ *+O*                                       | 0.35           |                | 7.96E+12                       |                                |
| 20  | OH*+* $\rightarrow$ *+OH*                                     | 0.22           |                | 4.16E+13                       |                                |

Table S4 Elementary processes included in the kMC simulation as well as corresponding kinetic parameters  
for Ni<sub>3</sub>Fe(211)-AB surface

| No. | Elementary process                                        | $E_{a,f}$ (eV) | $E_{a,r}$ (eV) | $v_{0,f}$ (s <sup>-1</sup> ) | $v_{0,r}$ (s <sup>-1</sup> ) |
|-----|-----------------------------------------------------------|----------------|----------------|------------------------------|------------------------------|
| 1   | CO(g)+* ↔ CO*                                             | 0              | 1.60           | a                            | b                            |
| 2   | H <sub>2</sub> (g)+2* ↔ H*+H*                             | 0              | 0.92           | c                            | b                            |
| 3   | CO*+* ↔ C*+O*                                             | 1.76           | 1.62           | 2.39E+13                     | 5.81E+13                     |
| 4   | CO*+H* ↔ COH*+*                                           | 1.28           | 0.89           | 1.99E+13                     | 1.50E+14                     |
| 5   | COH*+* ↔ C*+OH*                                           | 1.17           | 2.20           | 1.91E+13                     | 3.89E+13                     |
| 6   | CO*+H* ↔ HCO*+*                                           | 0.87           | 0.30           | 1.76E+13                     | 4.75E+13                     |
| 7   | HCO*+* ↔ CH*+O*                                           | 0.66           | 1.10           | 1.10E+13                     | 9.25E+12                     |
| 8   | C*+H* ↔ CH*+*                                             | 0.77           | 1.07           | 4.83E+13                     | 1.16E+14                     |
| 9   | CH*+H* ↔ CH <sub>2</sub> -1*+*                            | 0.63           | 0.37           | 5.18E+12                     | 5.36E+12                     |
| 10  | CH <sub>2</sub> -1*+* ↔ *+CH <sub>2</sub> *               | 0.29           | 0.65           | 2.21E+13                     | 1.18E+13                     |
| 11  | CH <sub>2</sub> *+H* ↔ CH <sub>3</sub> *+*                | 0.32           | 0.75           | 1.49E+12                     | 3.67E+12                     |
| 12  | CH <sub>3</sub> *+H* ↔ CH <sub>4</sub> (g)+2*             | 0.95           | 0.98           | 1.45E+13                     | d                            |
| 13  | O*+H* ↔ OH*+*                                             | 0.94           | 1.32           | 1.03E+14                     | 2.81E+13                     |
| 14  | OH*+H* ↔ H <sub>2</sub> O*+*                              | 1.53           | 0.83           | 9.63E+13                     | 1.45E+13                     |
| 15  | OH*+OH* ↔ H <sub>2</sub> O*+O*                            | 0.74           | 0.44           | 1.87E+13                     | 1.03E+13                     |
| 16  | H <sub>2</sub> O* → H <sub>2</sub> O(g)+*                 | 0.40           |                | b                            |                              |
| 17  | CO*+O* → 2*+CO <sub>2</sub> (g)                           | 1.91           | 1.21           | 1.68E+12                     |                              |
| 18  | CO*+OH* ↔ COOH-cis*+*                                     | 1.49           | 0.11           | 7.93E+12                     | 3.71E+13                     |
| 19  | COOH-cis* ↔ COOH-trans*                                   | 0.42           | 0.76           | 7.21E+12                     | 1.55E+13                     |
| 20  | COOH-trans* → CO <sub>2</sub> (g)+H*                      | 1.13           | 1.13           | 2.92E+13                     |                              |
| 21  | COOH-trans*+O* → CO <sub>2</sub> (g)+OH*+*                | 0.22           | 0.35           | 6.50E+13                     |                              |
| 22  | COOH-trans*+OH* → CO <sub>2</sub> (g)+H <sub>2</sub> O*+* | 0.29           | 0.12           | 1.33E+12                     |                              |
| 23  | CO*+* → *+CO*                                             | 0.28           |                | 1.00E+13                     |                              |
| 24  | H*+* → *+H*                                               | 0.21           |                | 2.34E+13                     |                              |
| 25  | O*+* → *+O*                                               | 0.38           |                | 9.73E+12                     |                              |
| 26  | OH*+* → *+OH*                                             | 0.47           |                | 1.01E+13                     |                              |

Table S5 Elementary processes included in the kMC simulation as well as corresponding kinetic parameters  
for Ni<sub>3</sub>Fe(211)-AA surface

| No. | Elementary process                                                    | $E_{a,f}$ (eV) | $E_{a,r}$ (eV) | $\nu_{0,f}$ (s <sup>-1</sup> ) | $\nu_{0,r}$ (s <sup>-1</sup> ) |
|-----|-----------------------------------------------------------------------|----------------|----------------|--------------------------------|--------------------------------|
| 1   | CO(g)+* $\leftrightarrow$ CO*                                         | 0              | 1.66           | a                              | b                              |
| 2   | H <sub>2</sub> (g)+2* $\leftrightarrow$ H*+H*                         | 0              | 0.90           | c                              | b                              |
| 3   | CO*+* $\leftrightarrow$ C*+O*                                         | 2.21           | 1.65           | 6.65E+12                       | 6.42E+13                       |
| 4   | CO*+H* $\leftrightarrow$ COH*+*                                       | 1.37           | 0.92           | 1.60E+13                       | 6.11E+13                       |
| 5   | COH*+* $\leftrightarrow$ C*+OH*                                       | 1.08           | 1.94           | 1.64E+13                       | 4.19E+13                       |
| 6   | CO*+H* $\leftrightarrow$ HCO*+*                                       | 0.71           | 0.21           | 1.41E+13                       | 5.31E+13                       |
| 7   | HCO*+* $\leftrightarrow$ CH*+O*                                       | 1.10           | 1.59           | 8.24E+12                       | 1.18E+13                       |
| 8   | C*+H* $\leftrightarrow$ CH*+*                                         | 0.87           | 0.88           | 2.44E+13                       | 3.70E+13                       |
| 9   | CH*+H* $\leftrightarrow$ CH <sub>2</sub> -1*+*                        | 0.73           | 0.36           | 1.22E+13                       | 2.63E+13                       |
| 10  | CH <sub>2</sub> -1*+* $\leftrightarrow$ *+CH <sub>2</sub> *           | 0.37           | 0.35           | 2.01E+13                       | 3.03E+12                       |
| 11  | CH <sub>2</sub> *+H* $\leftrightarrow$ CH <sub>3</sub> *+*            | 0.33           | 0.83           | 2.77E+12                       | 1.86E+12                       |
| 12  | CH <sub>3</sub> *+H* $\leftrightarrow$ CH <sub>4</sub> (g)+2*         | 0.92           | 1.07           | 6.76E+13                       | d                              |
| 13  | O*+H* $\leftrightarrow$ OH*+*                                         | 0.96           | 1.41           | 1.40E+14                       | 9.43E+13                       |
| 14  | OH*+H* $\leftrightarrow$ H <sub>2</sub> O*+*                          | 1.50           | 1.00           | 3.60E+14                       | 4.26E+13                       |
| 15  | OH*+OH* $\leftrightarrow$ H <sub>2</sub> O*+O*                        | 0.85           | 0.38           | 2.13E+13                       | 1.78E+13                       |
| 16  | H <sub>2</sub> O* $\rightarrow$ H <sub>2</sub> O(g)+*                 | 0.22           |                | b                              |                                |
| 17  | CO*+O* $\rightarrow$ 2*+CO <sub>2</sub> (g)                           | 2.02           | 1.21           | 2.40E+14                       |                                |
| 18  | CO*+OH* $\leftrightarrow$ COOH-cis*+*                                 | 1.30           | 0.25           | 6.51E+12                       | 2.71E+13                       |
| 19  | COOH-cis* $\leftrightarrow$ COOH-trans*                               | 0.57           | 0.68           | 2.17E+13                       | 7.01E+13                       |
| 20  | COOH-trans* $\rightarrow$ CO <sub>2</sub> (g)+H*                      | 1.01           | 1.08           | 1.77E+14                       |                                |
| 21  | COOH-trans*+O* $\rightarrow$ CO <sub>2</sub> (g)+OH*+*                | 0.20           | 0.12           | 1.21E+13                       |                                |
| 22  | COOH-trans*+OH* $\rightarrow$ CO <sub>2</sub> (g)+H <sub>2</sub> O*+* | 0.31           | 0.37           | 4.51E+12                       |                                |
| 23  | CO*+* $\rightarrow$ *+CO*                                             | 0.25           |                | 2.84E+12                       |                                |
| 24  | H*+* $\rightarrow$ *+H*                                               | 0.23           |                | 1.38E+13                       |                                |
| 25  | O*+* $\rightarrow$ *+O*                                               | 0.50           |                | 8.79E+12                       |                                |
| 26  | OH*+* $\rightarrow$ *+OH*                                             | 0.70           |                | 7.42E+13                       |                                |

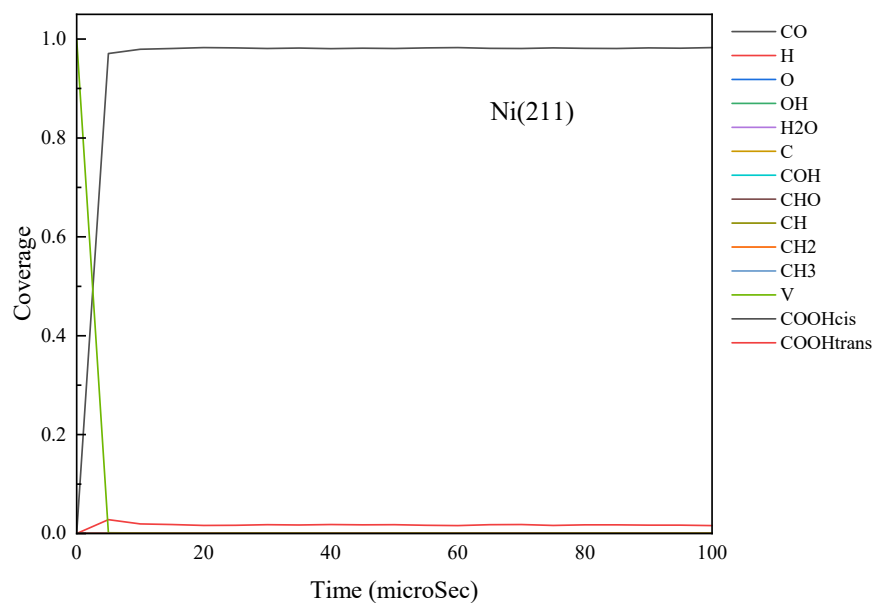

Figure S1 The variation of coverage in simulation time at 100 microSec on Ni(211) at 673 K

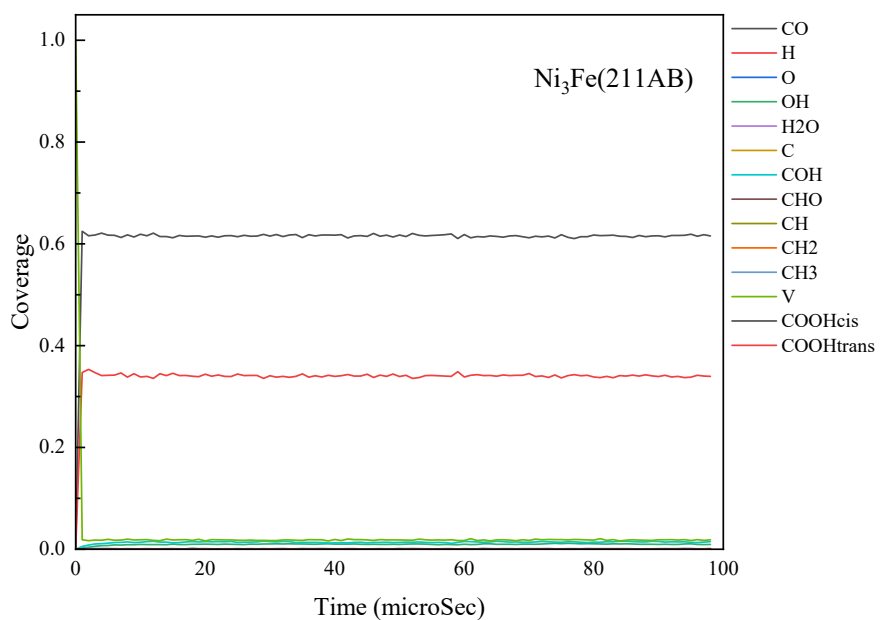

Figure S2 The variation of coverage in simulation time at 100 microSec on Ni<sub>3</sub>Fe(211AB) at 673K

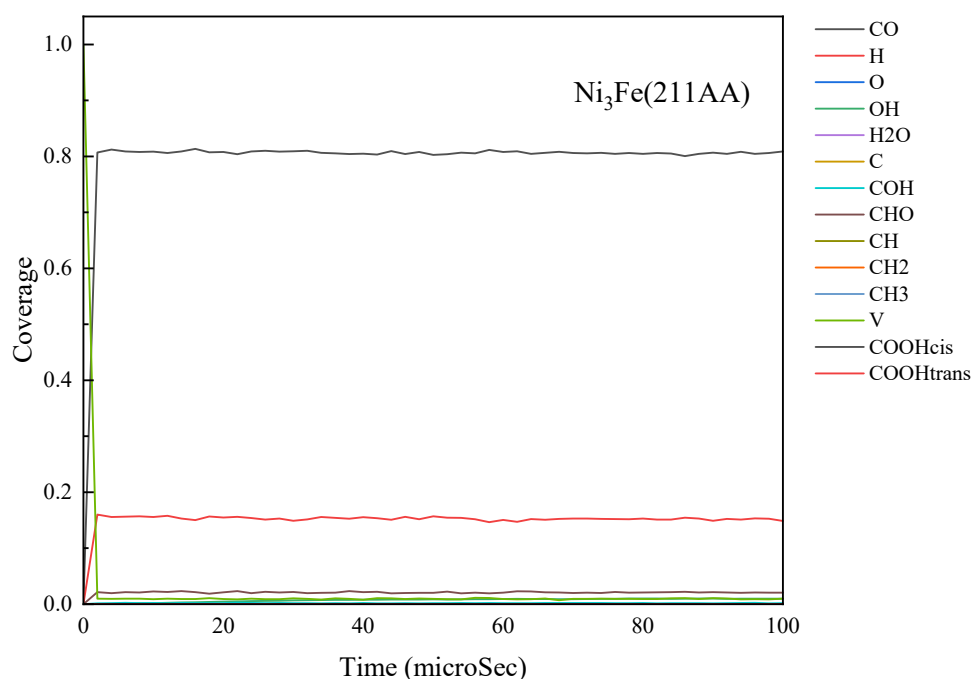

Figure S3 The variation of coverage in simulation time at 100 microSec on Ni<sub>3</sub>Fe(211AA) at 673 K

As can be seen from the figure, in a few microseconds, the coverage of each species has reached stability. The surface of Ni(211) is almost covered by CO, and the coverage of other intermediate species and H is very small. The surface of Ni<sub>3</sub>Fe(211AB) and Ni<sub>3</sub>Fe(211AA) is almost covered by CO and H, and the coverage of other intermediate species is very small. The figures indicate that the residence time of the intermediate is short, and the reaction system reaches stability at this time. The dissociation and hydrogenation of CO occur simultaneously on the catalyst surface, but the surface of Ni(211) is almost covered by CO, which is not conducive to hydrogenation reaction compared with Ni<sub>3</sub>Fe(211AB) and Ni<sub>3</sub>Fe(211AA).
